# Supplementary material for: Inferring Kangaroo Phylogeny from Incongruent Nuclear and Mitochondrial Genes
Source: PubMed Central journal article supplement (PMC3579791; doi:10.1371/journal.pone.0057745), 2013-02-22

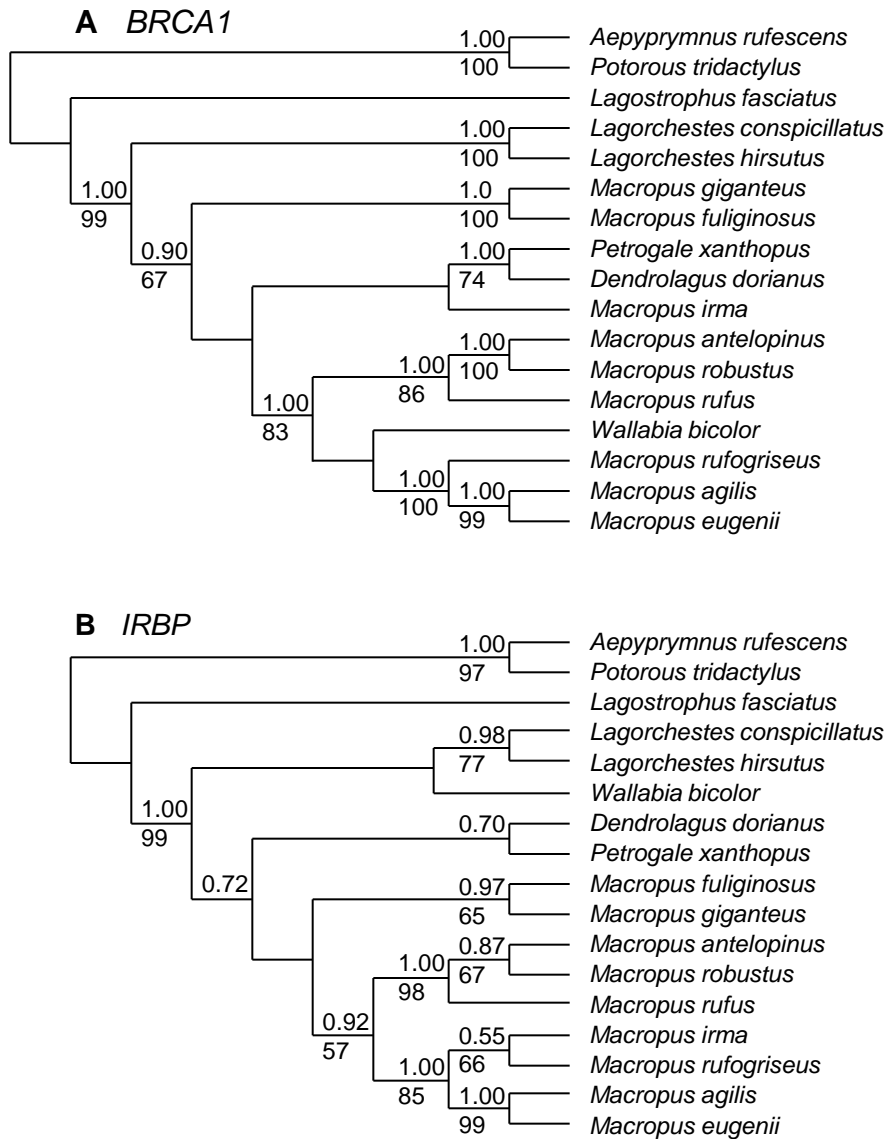

**Figure S1. Individual nuclear gene phylogenies.** (A) *BRCA1*, (B) *IRBP*, (C) *ApoB*, (D) *vWF* and (E) *RAG1*. MrBayes 3.2 Bayesian posterior probabilities (above 0.5) and PAUP\* 4.0b10 maximum likelihood bootstrap percentages (>50) are shown above and below branches respectively. Analyses were carried out as per the primary analysis for Nuc<sub>17</sub>, with substitution models shown in Table 2.

Figure S1 - continued

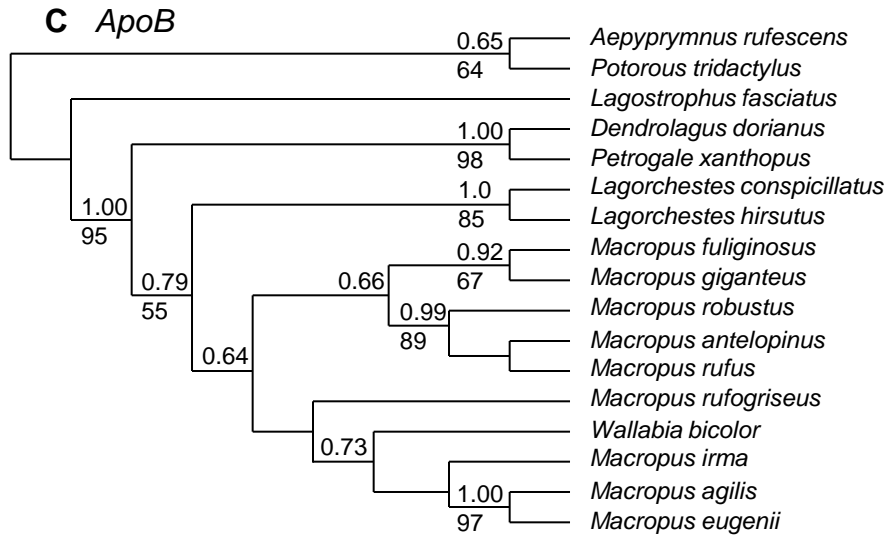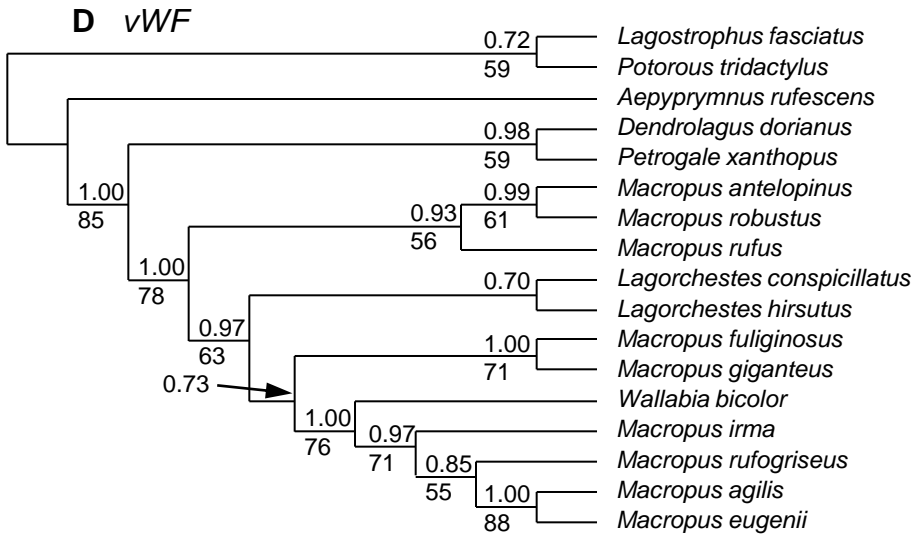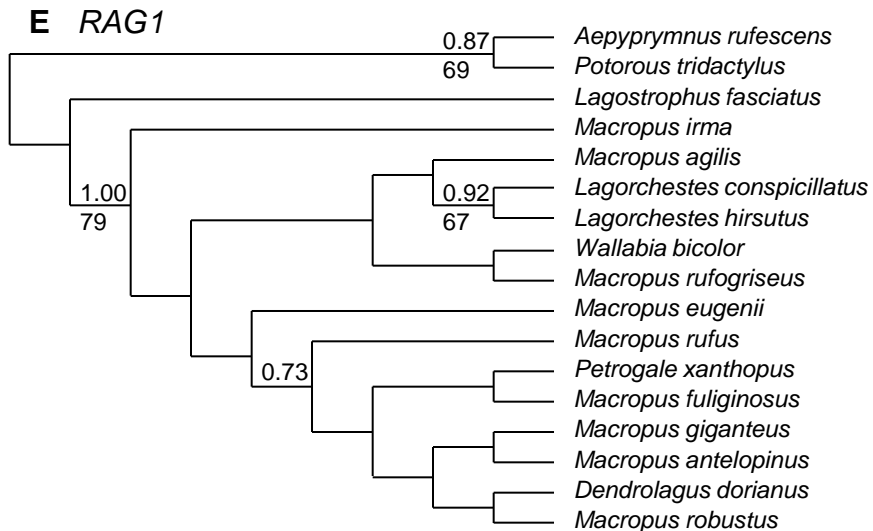

Supplement: pone.0057745.s001.pdf [file pone.0057745.s001.pdf]
