# Supplementary material for: Inferring Kangaroo Phylogeny from Incongruent Nuclear and Mitochondrial Genes
Source: PubMed Central journal article supplement (PMC3579791; doi:10.1371/journal.pone.0057745), 2013-02-22
Supplement: pone.0057745.s002.pdf [file pone.0057745.s002.pdf]

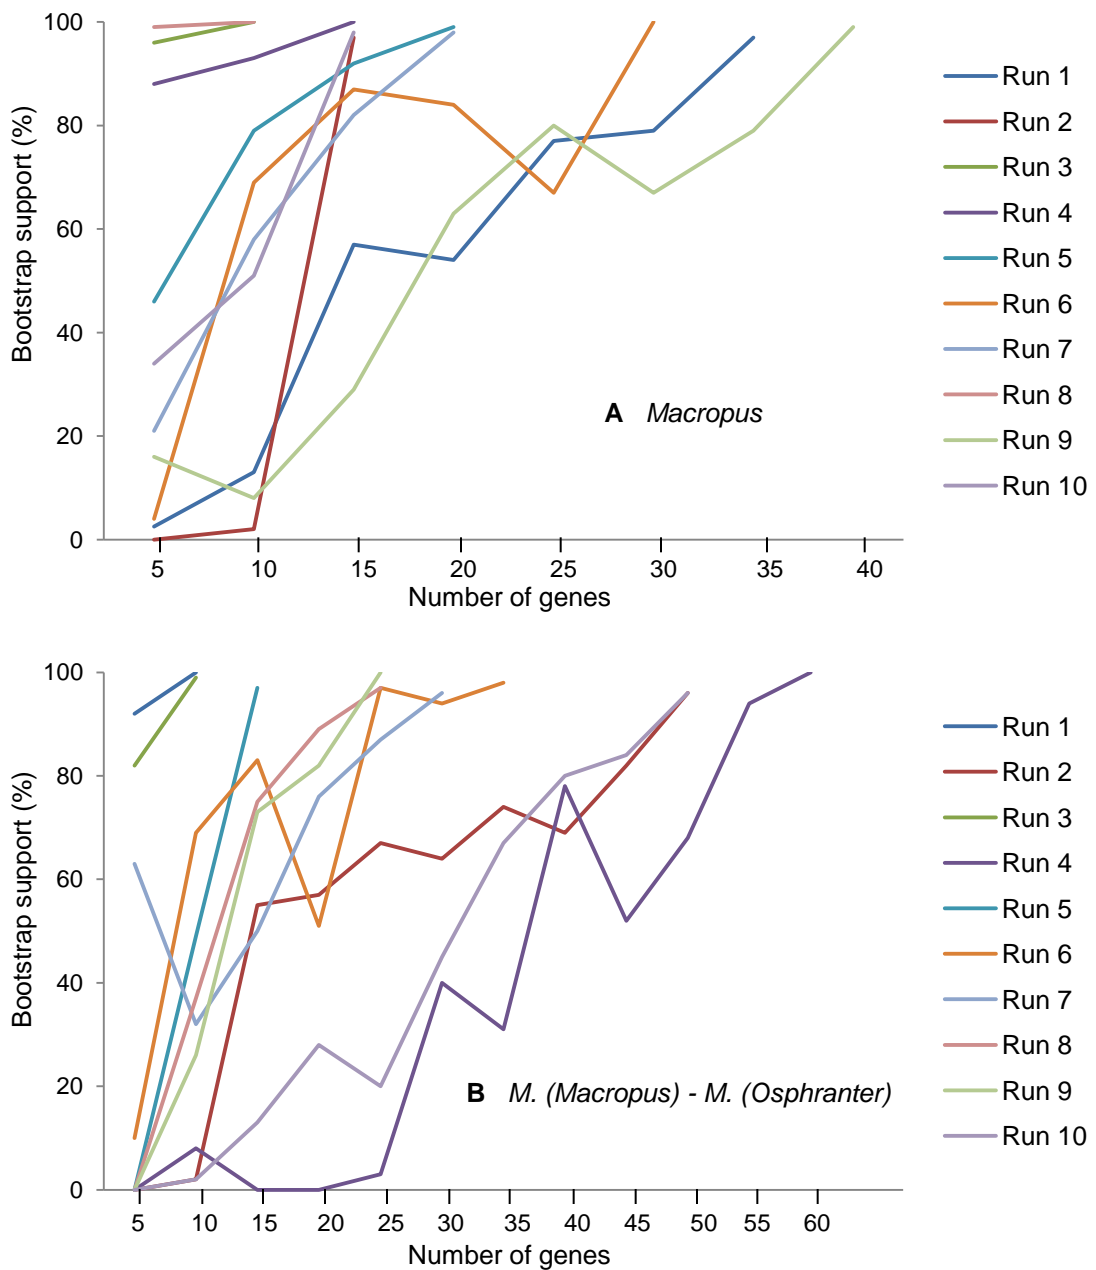

**Figure S2. Maximum likelihood bootstrap identification of the number of genes required to resolve macropodid phylogeny.** (A) for *Macropus* monophyly and (B) for the *M. (Macropus)*-*M. (Osphranter)* grouping. Simulated gene sequences (1,000 bp) were added in increments of five. Ten independent runs were continued until sufficient sequences were added for  $ML_{BP} > 95\%$ . Seven of 10 simulations reached 95%  $ML_{BP}$  with 20 genes for *Macropus* and 35 genes for *M. (Macropus)*-*M. (Osphranter)*.

Gene sequences were simulated on the overall species tree as described in the Methods. Coalescent trees were simulated in MCcoal with the best fitting  $N_e$  (100,000) from the individual gene simulations (Figure 3). These trees were used as guides for simulating sequences in Seq-Gen1.3.2 under the GTR+I+ $\Gamma$  model inferred from the Nuc<sub>16</sub> concatenate. ML bootstrap on the concatenated simulated datasets was carried out in PAUP\*4.0b10. Other coalescent simulations, either with two individuals per species or on the nuclear-only species tree produced similar results.
