# Supplementary material for: Inferring Kangaroo Phylogeny from Incongruent Nuclear and Mitochondrial Genes
Source: PubMed Central journal article supplement (PMC3579791; doi:10.1371/journal.pone.0057745), 2013-02-22
Supplement: pone.0057745.s003.pdf [file pone.0057745.s003.pdf]

**Table S1.** List of primers and conditions used for amplifying macropodid DNA

| Genome        | Gene amplified <sup>1</sup> | Primer name                                          | Sequence (5' – 3')                                      | ~ Amplicon Length (bp) | Annealing temp. (°C) | Primer reference                                 |                      |
|---------------|-----------------------------|------------------------------------------------------|---------------------------------------------------------|------------------------|----------------------|--------------------------------------------------|----------------------|
| Nuclear       | <i>IRBP</i>                 | IR_A_F                                               | ATGGCCAAGGTCCTCTTGGATAACTACTGCTT                        | 1300                   | 58 <sup>2</sup>      | Meredith et al. 2008                             |                      |
|               |                             | IR_B_R                                               | AGGTTCCATGATGAGGTGCTCCGTGTCCTG                          |                        |                      |                                                  |                      |
|               | <i>IRBP</i>                 | IR_A_F                                               | ATGGCCAAGGTCCTCTTGGATAACTACTGCTT                        | 600                    | 62 <sup>2</sup>      |                                                  | Meredith et al. 2008 |
|               |                             | IR_N_R                                               | CGCATCTTCTTGAGGATGTAG                                   |                        |                      |                                                  |                      |
|               | <i>IRBP</i>                 | IR_M_F                                               | CCCSTTTGTCATTTCTACC                                     | 700                    | 58 <sup>2</sup>      |                                                  | Meredith et al. 2008 |
|               |                             | IR_B_R                                               | AGGTTCCATGATGAGGTGCTCCGTGTCCTG                          |                        |                      |                                                  |                      |
| <i>ApoB</i>   | F60<br>MARS_R820            | GGAGAAGCCAAYCTGGATTTTCYT<br>GTYGTCCCATCTAACTTATACTGC | 750                                                     | 60 <sup>2</sup>        | Meredith et al. 2008 |                                                  |                      |
| <i>ApoB</i>   | F60<br>MARS_R474            | GGAGAAGCCAAYCTGGATTTTCYT<br>CATGTAGCCAAWTGRTGGCATCTC | 500                                                     | 60 <sup>2</sup>        | Meredith et al. 2008 |                                                  |                      |
| <i>ApoB</i>   | MARS_F420<br>MARS_R820      | CAATTCCTGAAATGACTCTGCC<br>GTYGTCCCATCTAACTTATACTGC   | 450                                                     | 60 <sup>2</sup>        | Meredith et al. 2008 |                                                  |                      |
| Mitochondrial | NADH1                       | ND1_1F<br>ND1_1R                                     | GGCAGAGCTGGYAATTGCAT<br>GAAATAAGGGGGCTTDCAC             | 960                    | 55 <sup>3,4</sup>    | Cao et al. 1998                                  |                      |
|               | NADH2                       | tMetFor<br>tAlaRev                                   | ATACCCCGAAAATGTTGGTTC<br>GATTTGCGTTCGAKTGATGCAAG        | 1050                   | 55 <sup>3,4</sup>    | Osborne & Christidis, 2001                       |                      |
|               | <i>Cytb</i>                 | <i>Cytb</i> _F14195<br><i>Cytb</i> _R15472           | CATTTTAGTATGGACTCTAACCATAACC<br>AGGGTGTTATACCTTCATTTTGG | 1150                   | 54 <sup>4</sup>      | This study                                       |                      |
|               | 12S rRNA                    | L2180_F<br>M_12S6_R                                  | AAAGCACAGCACTGAAGATGC<br>GCTCAAAATGGTCAGGGTTAGCTG       | 950                    | 58 <sup>4</sup>      | mod. from Titus & Frost 1996<br>This study       |                      |
|               | 16S rRNA                    | M_12S3_F<br>M_12S5_R                                 | AAACGTTAGGTCAAGGTGTAGC<br>GCAATTGCCAGCYCTGCCAC          | 1950                   | 58 <sup>4</sup>      | This study                                       |                      |
|               | 12/16S rRNA                 | L2180<br>H3628                                       | AAAGCACAGCACTGAAGATGCTG<br>GCTGTCTTTACAGGTGGCTGCT       | 1560                   | 55 <sup>3</sup>      | mod. from Titus & Frost 1996<br>Reed et al. 2001 |                      |

|          |                    |                                                 |      |                 |                                            |
|----------|--------------------|-------------------------------------------------|------|-----------------|--------------------------------------------|
| 16S rRNA | 16Sar<br>16Sbr     | CGCCTGTTTATCAAAAACAT<br>CCGGTYTGAACCTCAGATCAYGT | 550  | 55 <sup>3</sup> | Palumbi et al. 1996<br>Palumbi et al. 1996 |
| NADH2    | ND2a_3F<br>tAlaRev | GGGGTGMAAGCCCCCTTATT<br>GATTTGCGTTCGAKTGATGCAAG | 1205 | 55 <sup>3</sup> | This study                                 |
| NADH1    | ND1_1F<br>ND1_1R   | GGCAGAGCTGGYAATTGCAT<br>GAAATAAGGGGGCTTDCAC     | 960  | 55 <sup>3</sup> | Cao et al. 1998                            |

<sup>1</sup> Post-PCR purifications were performed either using Shrimp Alkaline Phosphatase and Exonuclease I (GE Healthcare/Crown scientific) or alternatively, using a Qiaquick purification kit (Qiagen Sciences, MD, USA). All amplicons were sequenced by Macrogen (Seoul, South Korea) on an Applied Biosystems 3730XL capillary sequencer. Geneious 5.4.3 (Biomatters, NZ) was used to examine the chromatograms and assemble the forward and reverse contigs for each gene.

<sup>2</sup> Murdoch University, nuclear genes: initial denaturation (5 min at 94°C); 35 cycles of denaturation (45 sec at 94°C); variable annealing temperatures (see Table above, for 45 sec); extension (68°C for 1-2 min, depending on fragment length); final extension (10 min at 72°C).

<sup>3</sup> Australian National University, mitochondrial genes: initial denaturation (2 min at 94 C); 30 cycles of denaturation (15 sec at 94 C), annealing (30 sec at 50 – 55 C), extension (90 sec at 68 C); final extension (4 min at 68C).

<sup>4</sup> Murdoch University, mitochondrial genes: initial denaturation (3 min at 94°C); 35 cycles of denaturation (30 sec at 94°C); variable annealing temperatures (see Table above, for 30 sec); extension (90 sec at 68°C); final extension (10 min at 72°C).

## References

Cao Y, Janke A, Waddell PJ, Westerman M, Takenaka O, Murata S, Okada N, Pääbo S, Hasegawa M (1998). Conflict among individual mitochondrial proteins in resolving the phylogeny of eutherian orders. *J. Mol. Evol.* 47: 307-322.

Meredith RW, Westerman M, Springer MS (2008). A timescale and phylogeny for "bandicoots" (Peramelemorphia: Marsupialia) based on sequences for five nuclear genes. *Mol. Phylogenet. Evol.* 47: 1-20.

Osborne ML, Christidis L, 2001. Molecular Phylogenetics of Australo–Papuan Possums and Gliders (Family Petauridae). *Mol. Phylogenet. Evol.* 20: 211–224.

Palumbi S, Martin A, Romano S, McMillan WO, Stice L, Grabowski G (1991). *The simple fool's guide to PCR*, Ver. 2.0 Honolulu, University of Hawaii.

Reed K, Keogh JS., Scott IA, Roberts JD, Doughty P (2001). Molecular phylogeny of the Australian frog genera *Crinia*, *Geocrinia*, and allied taxa (Anura: Myobatrachidae). *Mol. Phylogent. Evol.* 21: 294-308.

Titus TA, Frost DR (1996). Molecular homology assessment and phylogeny in the lizard family Opluridae (Squamata: Iguania), *Mol. Phylogent. Evol.* 6: 49-62.
