# Supplementary material for: Inferring Kangaroo Phylogeny from Incongruent Nuclear and Mitochondrial Genes
Source: PubMed Central journal article supplement (PMC3579791; doi:10.1371/journal.pone.0057745), 2013-02-22
Supplement: pone.0057745.s004.pdf [file pone.0057745.s004.pdf]

**Table S2.** GenBank accession numbers for sequences included in the mitochondrial data matrices.

| Taxon                              | <i>NADH1 &amp; 2</i>              | <i>Cytb</i>                  | 12S&16S rRNA                      |
|------------------------------------|-----------------------------------|------------------------------|-----------------------------------|
| <i>Aeppypyrmnus rufescens</i>      | <u>JN003376</u> , <u>JN003377</u> | EU086684                     | AF027999                          |
| <i>Potorous tridactylus</i>        | AJ639873                          | AJ639873                     | AJ639873                          |
| <i>Lagostrophus fasciatus</i>      | NC008447                          | NC008447                     | NC008447                          |
| <i>Dendrolagus dorianus</i>        | <u>JN003378</u> , <u>JN003379</u> | <u>JN003380</u>              | AF027989                          |
| <i>Petrogale xanthopus</i>         | <u>JN003381</u> , <u>JN003382</u> | EF368032                     | AF187886                          |
| <i>Lagorchestes hirsutus</i>       | NC008136                          | NC008136                     | NC008136                          |
| <i>Lagorchestes conspicillatus</i> | <u>JN003383</u> , <u>JN003384</u> | <u>JN003385</u>              | <u>JN003386</u>                   |
| <i>Wallabia bicolor</i>            | <u>JN003387</u> , <u>JN003388</u> | EF368031,<br><u>JX504693</u> | AF027987                          |
| <i>Macropus irma</i>               | <u>JN967004</u> , <u>JN967006</u> | <u>JN967002</u>              | <u>JN966998</u> , <u>JN967000</u> |
| <i>Macropus rufogriseus</i>        | <u>JN003392</u> , <u>JN003393</u> | EF368027                     | <u>JN003394</u> , <u>JN003395</u> |
| <i>Macropus eugenii</i>            | <u>JN003389</u> , <u>JN003390</u> | AY237226                     | AY245606, <u>JN003391</u>         |
| <i>Macropus agilis</i>             | AF425981                          | EF368029                     | AF027986                          |
| <i>Macropus dorsalis</i>           | <u>JN00402</u> , <u>JN003403</u>  |                              | <u>JN003404</u>                   |
| <i>Macropus rufus</i>              | <u>JN967005</u> , <u>JN967007</u> | <u>JN967003</u>              | <u>JN966999</u> , <u>JN967001</u> |
| <i>Macropus robustus</i>           | Y10524                            | Y10524                       | Y10524                            |
| <i>Macropus antilopinus</i>        |                                   | EF368024                     |                                   |
| <i>Macropus giganteus</i>          | <u>JN003396</u> , <u>JN003397</u> | U87137                       | AF187885                          |
| <i>Macropus fuliginosus</i>        | <u>JN003398</u> , <u>JN003399</u> | <u>JN003400</u>              | <u>JN003401</u>                   |

New sequences obtained in the present study are underlined.
